# Supplementary material for: Evaluation of atorvastatin efficacy and toxicity on spermatozoa, accessory glands and gonadal hormones of healthy men: a pilot prospective clinical trial
Source: Reprod Biol Endocrinol. 2014 Jul 12;12:65. doi: 10.1186/1477-7827-12-65 (PMC4114109; doi:10.1186/1477-7827-12-65)
Supplement: Additional file 2: Table S1 — Prospective studies analyzing statin effects on human gonadal steroidogenesis and semen quality. *after 6 months of therapy, ref.: reference, treat.: treatment, normochol.: normocholesterolæmic; hyperchol.: hypercholesteroleamic. Test: testosterone, Num: sperm number, Motil: sperm motility; Morph: sperm morphology; Acc. glands: Accessory glands; Cap: capacitation; AR: Acrosome reaction. [file 1477-7827-12-65-S2.pdf]

| ref.                       | n   | age<br>range<br>years | subject lipids<br>statut                       | treat.<br>period<br>months | statins molecule                       | statin<br>dose<br>mg/d | Effets on human |    |     |       |       |      |                |            |                 |
|----------------------------|-----|-----------------------|------------------------------------------------|----------------------------|----------------------------------------|------------------------|-----------------|----|-----|-------|-------|------|----------------|------------|-----------------|
|                            |     |                       |                                                |                            |                                        |                        | Hormones        |    |     | Semen |       |      |                |            |                 |
|                            |     |                       |                                                |                            |                                        |                        | Test            | LH | FSH | Num   | Motil | Morp | Acc.<br>glands | Cap<br>/AR | Semen<br>lipids |
| Present study              | 17  | 20-38                 | normochol.<br>men                              | 5/ 3<br>after              | atorvastatin                           | 10                     | =               | =  | =   | ↓     | ↑     | ↓    | ↓              | =/↓        | =               |
| Santini et al., 2003       | 24  | 54-72                 | type 2 diabetic<br>hyperchol. men<br>and women | 3                          | atorvastatin                           | 20                     | =               | =  | =   |       |       |      |                |            |                 |
| Bôhm et al., 2004          | 22  | 56-76                 | hyperchol. men<br>and women                    | 3                          | pravastatin/<br>placebo                | 40                     | =               | =  | =   |       |       |      |                |            |                 |
| Hyypa et al., 2003         | 120 | 35-64                 | hyperchol. men                                 | 3                          | simvastatin/<br>placebo                | 20                     | ↓               |    |     |       |       |      |                |            |                 |
| Dobs et al., 2000a         | 164 | 21-55                 | hyperchol. men                                 | 3                          | simvastatin/<br>placebo                | 80                     | ↓               | =  | =   |       |       |      |                |            |                 |
| Dobs et al., 2000b         | 159 | 21-55                 | hyperchol. men                                 | 6                          | pravastatin/placebo                    | 40                     | =               | =  | =   | =     | =     | =    |                |            |                 |
|                            |     |                       |                                                |                            | simvastatin/placebo                    | 20                     | =               | =  | =   | =     | =     | ↑    |                |            |                 |
|                            |     |                       |                                                |                            | simvastatin/placebo                    | 40                     | =               | =  | =   | =     | =     | =    |                |            |                 |
| Stein et al., 1998         | 521 | 45-66                 | hyperchol. men<br>and women                    | 6                          | simvastatin                            | 40 to 80               | ↓               | =  | =   |       |       |      |                |            |                 |
| Bernini et al., 1998       | 10  | 31-60                 | hyperchol. men                                 | 6                          | pravastatin                            | 20                     | =               | =  | =   | =     | =     | =    |                |            |                 |
| Azzarito et al., 1996      | 8   | 54-58                 | type IIA<br>hyperchol. men                     | 3-12                       | simvastatin                            | 20                     | ↓*              | =  | =   |       |       |      |                |            |                 |
| Travia et al. 1995         | 24  |                       | hyperchol. men                                 | 6-36/ 2<br>after           | simvastatin                            | 40                     | =               |    |     |       |       |      |                |            |                 |
|                            |     |                       |                                                |                            | pravastatin                            | 40                     | =               |    |     |       |       |      |                |            |                 |
| Rossato et al., 1993       | 18  | 42-58                 | hyperchol. men                                 | 1-12                       | simvastatin                            | 10                     | =               | =  | =   |       |       |      |                |            |                 |
| Dobs et al., 1993          | 64  | 21-70                 | hyperchol. men<br>and women                    | 6-2/ 12<br>after           | pravastatin/placebo                    | 20                     | =               | =  | =   | ↓ *   | ↓ *   | =    |                |            |                 |
|                            |     |                       |                                                |                            | + cholestyramine                       | 80                     | =               | =  | =   | =     | ↓     | =    |                |            |                 |
| Purvis et al., 1992        | 19  | 20-49                 | hyperchol. men                                 | 3,5                        | simvastatin/placebo                    | 40                     | =               | =  | =   | =     | =     | =    | =              |            |                 |
| Azzarito et al., 1992      | 10  | 51-66                 | hyperchol. men<br>and women                    | 12                         | simvastatin                            | 20 to 40               | =               |    |     |       |       |      |                |            |                 |
| Jay et al., 1991           | 23  |                       | hyperchol. men<br>and women                    | 3/ 6<br>after              | pravastatin/cholesty<br>ramine/placebo |                        | =               | =  | =   |       |       |      |                |            |                 |
| Farnsworth et al.,<br>1987 | 16  | 28-66                 | hyperchol. men                                 | 4                          | lovastatin/neomycin<br>/placebo        | 40                     | =               | =  | =   | =     | ↓     |      |                |            |                 |
| Tobert et al. 1982         | 59  | 18-45                 | normochol.<br>men                              | 1                          | lovastatin/placebo                     | 6.25 to<br>50          | =               |    |     |       |       |      |                |            |                 |
